## Myocardial work analysis is a potential novel tool to diagnose subclinical cardiac dysfunction in cirrhotic cardiomyopathy

<sup>1</sup>University Emergency Hospital of Bucharest, Bucharest, Romania

<sup>2</sup>University of Medicine and Pharmacy Carol Davila, Bucharest, Romania

**Funding Acknowledgements:** This work was supported by a grant of Ministry of Research and Innovation, CNCS-UEFISCDI, project number PN-III-P1-1-TE-2016-0669, within PNCDI III

**Background.** Cirrhotic cardiomyopathy (CCM) is defined as systolic and/or diastolic cardiac dysfunction, associated with high preload and low afterload. Thus, assessment of cardiac dysfunction in these circumstances is still debatable. Left ventricular (LV) deformation is still load-dependent, and does not reflect directly myocardial energy consumption. Since myocardial work (MW) incorporates both deformation and afterload, it might be a better alternative for the assessment of LV function in CCM.

**Methods.** 80 subjects were assessed by 2D conventional and speckle tracking echocardiography (STE): 40 patients with liver cirrhosis (LC) ( $58 \pm 8$  years, 23 males), free of any cardiovascular disease or diabetes, and 40 age and gender matched normal, control subjects. Left ventricular ejection fraction (LVEF) and systolic/diastolic blood pressure (SBP/DBP) were measured. A new approach was used to evaluate myocardial work by 2DSTE: global constructive work (GCW), as the "positive" work of the heart; global wasted work (GWW), as the "negative" work of the heart; global work efficiency (GWE), as the  $GCW/(GCW + GWW)$  in %; and global work index (GWI), as the GCW added to GWW. E/E' ratio, left atrial volume index (LAVi), and systolic pulmonary arterial pressure (sPAP) were also assessed.

**Results.** Patients with LC had significantly lower SBP/DBP than controls, with similar LVEF (Table). GCW and GWI were decreased in patients with LC, probably due to decrease in afterload, which shifts LV work to a lower level of energy. GWE and GWW were similar to controls. By segmental analysis (18 segments model), apical and mid antero-lateral segments were the first affected in terms of myocardial work, with higher WW, low WE, but without a compensatory increase in CW in other segments, suggesting a regional myocardial dysfunction. All patients with LC presented significantly elevated E/E' ratio, LAVi, and sPAP, compared to controls (Table).

**Conclusion.** Myocardial global constructive work and global work index decrease in LC patients, compared to normal individuals, probably due to augmented peripheral vasodilatation. Apical and mid antero-lateral segments are the first affected. Assessment of global and regional MW might be a potential new tool to assess CCM, and to understand the relationship between LV remodeling and increased filling pressure under different loading conditions.

### Comparative myocardial work indices

| group         | SBP<br>(mmHg) | DBP     | LVEF (%) | E/E'      | LAVI        | sPAP   | GWl        | GWE (%) | GCW (mmHg<br>) | GWW<br>(mmHg %) |
|---------------|---------------|---------|----------|-----------|-------------|--------|------------|---------|----------------|-----------------|
| LC (40)       | 111 ± 14      | 69 ± 12 | 59 ± 7   | 8.5 ± 2.5 | 45.9 ± 14.5 | 26 ± 9 | 1927 ± 379 | 95 ± 2  | 2068 ± 386     | 90.1 ± 49       |
| Controls (40) | 126 ± 14      | 76 ± 8  | 61 ± 7   | 7.5 ± 2.2 | 31.8 ± 6.8  | 21 ± 8 | 2123 ± 353 | 95 ± 2  | 2302 ± 335     | 94.4 ± 49       |
| P value       | 0.001         | 0.004   | 0.3      | 0.05      | 0.001       | 0.009  | 0.01       | 0.9     | 0.005          | 0.7             |

Abstract P1513 Figure. Myocardial Work Cirrhotic Cardiomyopathy

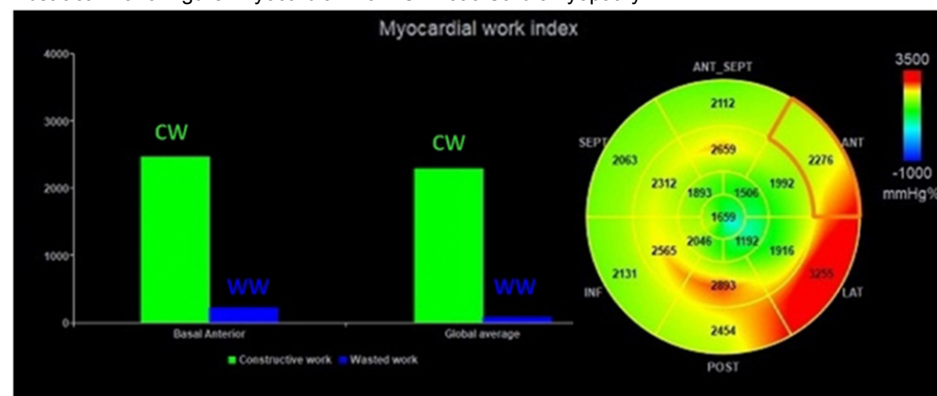

Source: http://academic.oup.com/ehjcimaging/article-pdf/21/Supplement_1/jez319.937/31865198/jez319.937.pdf
